# Supplementary material for: Carbon oxidation with sacrificial anodes to inhibit O 2 evolution in membrane-less bioelectrochemical systems for microbial electrosynthesis
Source: Royal Society of Chemistry journal article supplement (doi:10.1039/d3ey00141e), 2023-01-01
Supplement: d3ey00141e1.pdf [file d3ey00141e1.pdf]

1  
2  
3  
4  
5  
6  
7  
8  
9  
10  
11  
12  
13  
14  
15  
16  
17  
18  
19

## Supplementary Information

Carbon oxidation with sacrificial anodes to inhibit O<sub>2</sub> evolution in membrane-less bioelectrochemical systems for microbial electrosynthesis

*Nils Rohbohm<sup>a</sup>, Tianran Sun<sup>a,b</sup>, Ramiro Blasco-Gómez<sup>a,c</sup>, James M. Byrne<sup>d,e</sup>,  
Andreas Kappler<sup>d,f</sup> and Largus T. Angenent<sup>\*a,f,g,h,i</sup>*

<sup>a</sup>Environmental Biotechnology Group, Department of Geosciences, University of Tübingen, Schnarrenbergstr. 94-96, 72076 Tübingen, Germany

<sup>b</sup>State Key Lab of Urban and Regional Ecology, Research Center for Eco-Environmental Sciences, Chinese Academy of Sciences, Beijing 100085, China

<sup>c</sup>Laboratory of Chemical and Environmental Engineering (LEQUIA), Institute of the Environment, University of Girona, Carrer Maria Aurelia Capmany, 69, 17003 Girona, Spain

<sup>d</sup> Geomicrobiology group, Department of Geosciences, University of Tübingen, Schnarrenbergstr. 94-96, 72076 Tübingen, Germany

<sup>e</sup> School of Earth Sciences, University of Bristol, Wills Memorial Building, Queens Road, Bristol, BS8 1RJ, United Kingdom

<sup>f</sup>Cluster of Excellence: EXC 2124: Controlling Microbes to Fight Infection, Tübingen, 72076, Germany

<sup>g</sup> AG Angenent, Max Planck Institute for Biology, Max Planck Ring 5, D-72076 Tübingen, Germany

<sup>h</sup> Department of Biological and Chemical Engineering, Aarhus University, Gustav Wieds Vej 10D, 8000 Aarhus C, Denmark

<sup>i</sup> The Novo Nordisk Foundation CO<sub>2</sub> Research Center (CORC), Aarhus University, Gustav Wieds Vej 10C, 8000 Aarhus C, Denmark

20 **Supplementary note 1:**

21 **Determination of the exchange current density and Tafel slope**

22 For the determination of the exchange current density for the carbon oxidation, OER, and HER, the Butler-Volmer equation (**Eq.**  
23 **S1**) was used and transformed to determine  $j_0$  from its interception at the y-axis.<sup>1</sup> The Butler-Volmer equation (**Eq. S1**) is described  
24 as followed:

$$j = j_0 \left\{ \exp \left[ \frac{\alpha_a z F}{RT} \eta \right] - \exp \left[ \frac{\alpha_c z F}{RT} \eta \right] \right\} \quad (\text{S1})$$

25 With  $j$  the current density,  $j_0$  the exchange current density,  $\alpha_a$  and  $\alpha_c$  the anodic and cathodic charge transfer coefficient,  
26 respectively,  $z$  the number of electrons involved in the reaction,  $F$  the Faraday constant,  $R$  the universal gas constant,  $T$  the  
27 temperature, and  $\eta$  the activation overpotential.

28 When  $\eta \gg 0$ , the **Eq. S1** simplifies to **Eq. S2** :

$$\eta = \frac{2.3 RT}{\alpha F} \log j_0 - \frac{2.3 RT}{\alpha F} \log j \quad (\text{S2})$$

29 **Eq. S2** can be transformed into the Tafel equation to calculate the Tafel slope, which was used to calculate the Tafel slopes of  
30 magnetite:

$$\eta = \pm \frac{2.3 RT}{\alpha F} \log \frac{j}{j_0} + A \quad (\text{S3})$$

$$\eta = B \log \frac{j}{j_0} + A \quad (\text{S4})$$

31 With  $B$  the Tafel slope, and  $A$  the symmetry factor. The exchange current density  $j_0$  and the Tafel slope are calculated from  
32  $\log |j|$  vs.  $\eta$  by the interception of the y-axis and the slope, respectively.

33

34 **Supplementary note 2:**

35 **Magnetite analyses**

36 We investigated magnetite as a possible redox mediator. We fabricated magnetite anodes with activated carbon, which is our  
37 carbon source for carbon oxidation, to increase the conductivity of magnetite, which is a semi-conductor.<sup>2</sup> Since the conductivity  
38 of the electrode can vary depending on the amount of activated carbon used, we investigated which ratio of magnetite to  
39 activated carbon is suitable for higher current generation, longevity, and inhibition of O<sub>2</sub> evolution. Therefore, we performed  
40 abiotic tests with different ratios of magnetite and activated carbon ranging from 20% to 100% of the total activated carbon. We  
41 used the chronoamperometric method to determine the electronic conductivity of our mixtures and set the WE at +0.6 V vs.  
42 Ag/AgCl. The current of a chronoamperometric graph decreased exponentially to reach an asymptotic value, which was used to  
43 calculate the conductivity (**Fig. S11**). The specific electronic conductivity  $\sigma$  was calculated (**Eq. S5**).

$$\sigma = \frac{I \cdot D}{E \cdot A} \quad (\text{S5})$$

44 Where  $I$  is the asymptotic current,  $D$  is the thickness of the electrode ( $D = 0.4$  cm),  $E$  is the applied potential, and  $A$  is the surface  
45 area of the electrode ( $A = 0.28$  cm<sup>2</sup>). The calculated specific electronic conductivities of 40% magnetite and 60% activated carbon  
46 showed the highest electronic conductivity with  $3.89 \times 10^{-4}$  S·cm<sup>-1</sup> and was further analyzed for its ability to inhibit O<sub>2</sub> (**Table S2**).

47 A critical aspect of sufficient electrical conductivity is a homogenous distribution of magnetite on activated carbon particles.  
48 Ideally, only a thin layer of magnetite is adsorbed on the surface of the activated carbon. To analyze the distribution of magnetite  
49 on activated carbon, we characterized synthesized magnetite on activated carbon with X-ray diffraction (XRD). We compared  
50 synthesized magnetite with the following materials: **(1)** pure magnetite; **(2)** pure activated carbon; and **(3)** commercial magnetite  
51 (**Fig. S12**). The XRD patterns of magnetite, magnetite on activated carbon, and commercial magnetite show overlapping  
52 diffraction peaks for the whole spectrum, confirming that our synthesis contains magnetite. Further comparison of the XRD peaks  
53 shows a good agreement with standard patterns, indicating high crystalline quality. However, because maghemite's XRD pattern  
54 is virtually indistinguishable from the XRD pattern of magnetite, we analyzed the Fe(II)/Fe(III) ratio with the ferrozine assay. The  
55 ratio of Fe(II)/Fe(III) found in our samples corresponded to  $0.40 \pm 0.1$ , which is 20% lower than the ideal ratio of 0.5 for magnetite.  
56 This means that 20% of our material was oxidized, likely to maghemite. The XRD pattern of the activated carbon can be attributed  
57 to amorphous carbon that is also observed in magnetite coated activated carbon.

58 Scanning electron micrograph of magnetite on activated carbon demonstrated a rough and porous particle (Fig. S13A).  
59 Furthermore, close-up views of the particle showed that magnetite was synthesized as round-shaped nanoparticles (Fig. S13B,C).  
60 However, it was not possible to identify whether magnetite was homogeneously coated on activated carbon. To underline the  
61 homogenous distribution of magnetite, we performed EDX to detect the iron on the surface. By detecting the Fe with Fe K $\alpha$   
62 energy-dispersive X-ray spectroscopy (EDX) elemental mapping of magnetite-coated activated carbon, we detected the  
63 distribution of Fe. The overlay of a magnetite-coated activated carbon particle SEM micrograph with the elemental mapping of  
64 Fe confirmed that Fe was very well dispersed on top of the activated carbon particle (Fig. S14 and S15).

#### 65 **The stability of magnetite anodes is primarily determined by the crystal structure and purity of the magnetite mineral**

66 We calculated the conductivity of different magnetite to activated carbon ratios and found that the ratio of 40%:60% magnetite  
67 to activated carbon obtained higher conductivities for our electrodes (Eq. 5 and Fig. S11). To understand how this ratio functions  
68 in stability and longevity, we prepared triplicates of 40%:60% magnetite to activated carbon electrodes as our counter electrodes  
69 and poised the carbon cloth WE at -0.8 V vs. Ag/AgCl. After 7 days, the liquid/electrode interface developed an orange precipitate  
70 of Fe(III) at each electrode. After the experiment, we analyzed each Fe(II)/Fe(III) electrode ratio with a sequential extraction. We  
71 compared them with the starting material (Fig. S16) and analyzed the abundance of Fe(II) and Fe(III) for each section (electrode  
72 liquid interface, middle section, upper section). Here, the starting material was partially oxidized with a stoichiometric ratio of  
73 around 0.44. After 7 days of oxidation, the outer layer of the magnetite particle was nearly completely oxidized, while the  
74 stoichiometric ratio of the bulk was similar to the initial stoichiometric ratio of magnetite. In conclusion, activated carbon coated  
75 magnetite showed nearly complete oxidation at the outer layer that might prevent a stable and durable anode. Refer to the main  
76 text for further information on the durability of magnetite anodes under section "Magnetite, which is an alternative redox  
77 mediator to soluble iron, shortened the optimum performance period"

78

**Table S1 | Comparison of abiotic and biotic current densities with their respective coulombic efficiencies and references**

| Product         | Current density [mA cm <sup>-2</sup> ] | Coulombic Efficiency [%] |
|-----------------|----------------------------------------|--------------------------|
| <b>Abiotic</b>  |                                        |                          |
| H <sub>2</sub>  | Up to 2000                             | 99 <sup>3</sup>          |
| Ethanol         | 250                                    | 46 <sup>4</sup>          |
| CH <sub>4</sub> | 200                                    | 70 <sup>5</sup>          |
| <b>Biotic</b>   |                                        |                          |
| Acetate         | 10                                     | 100 <sup>6</sup>         |
| CH <sub>4</sub> | 1                                      | 99 <sup>7</sup>          |

79

80

**Table S2 | The electronic conductivity of different activated carbon to magnetite and hematite percentages calculated by chronoamperometry (CA) method.**

| Activated carbon to magnetite       | Electronic conductivity [S/cm] |
|-------------------------------------|--------------------------------|
| 100% activated carbon               | $5.08 \times 10^{-8}$          |
| 60% activated carbon, 40% magnetite | $3.89 \times 10^{-4}$          |
| 40% activated carbon, 60% magnetite | $2.91 \times 10^{-4}$          |
| 20% activated carbon, 80% magnetite | $1.91 \times 10^{-4}$          |
| 60% activated carbon, 40% maghemite | $5.31 \times 10^{-6}$          |

81

82

83  
84

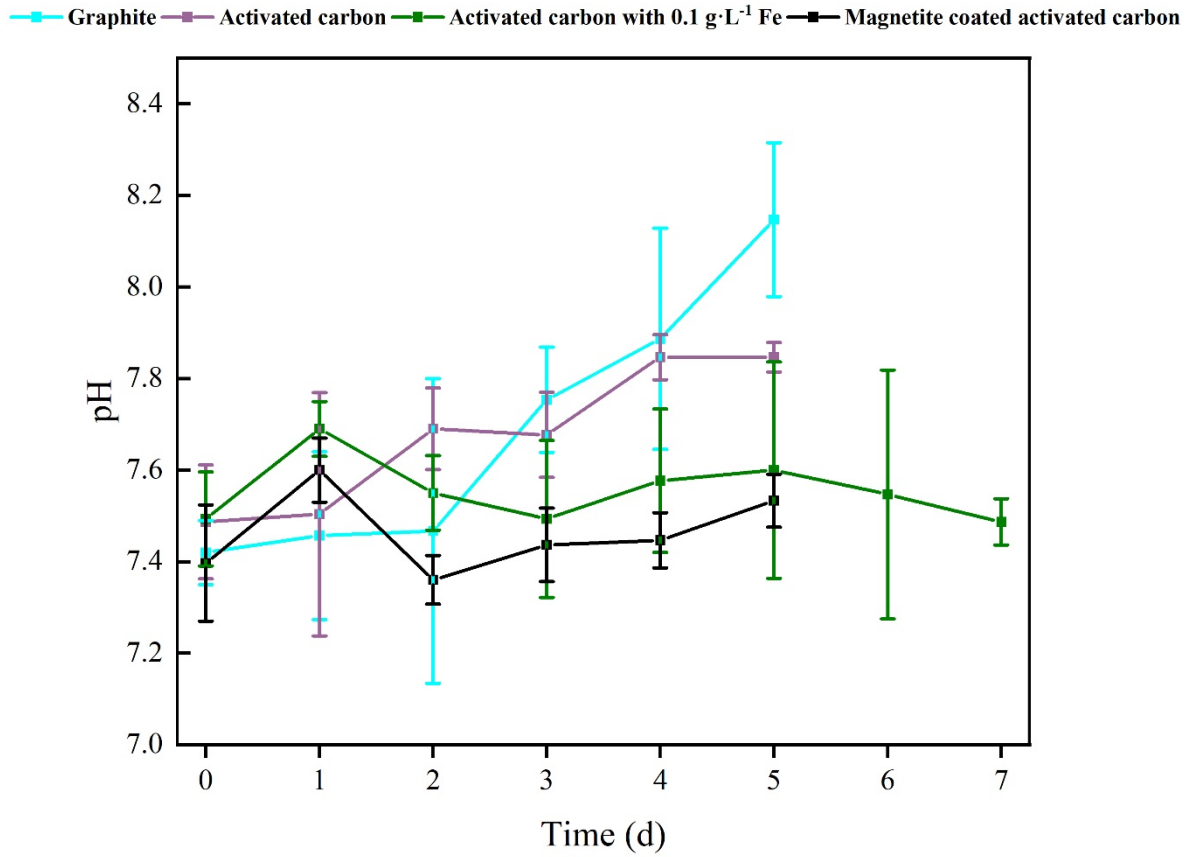

85  
86 **Figure S1:** Measured pH during some of the BES experiments using graphite, activated carbon with and without added iron, and  
87 magnetite-coated activated-carbon anodes.

88

—■— Graphite —■— Activated carbon —■— Activated carbon with 0.1 g·L Fe —■— Magnetite coated activated carbon

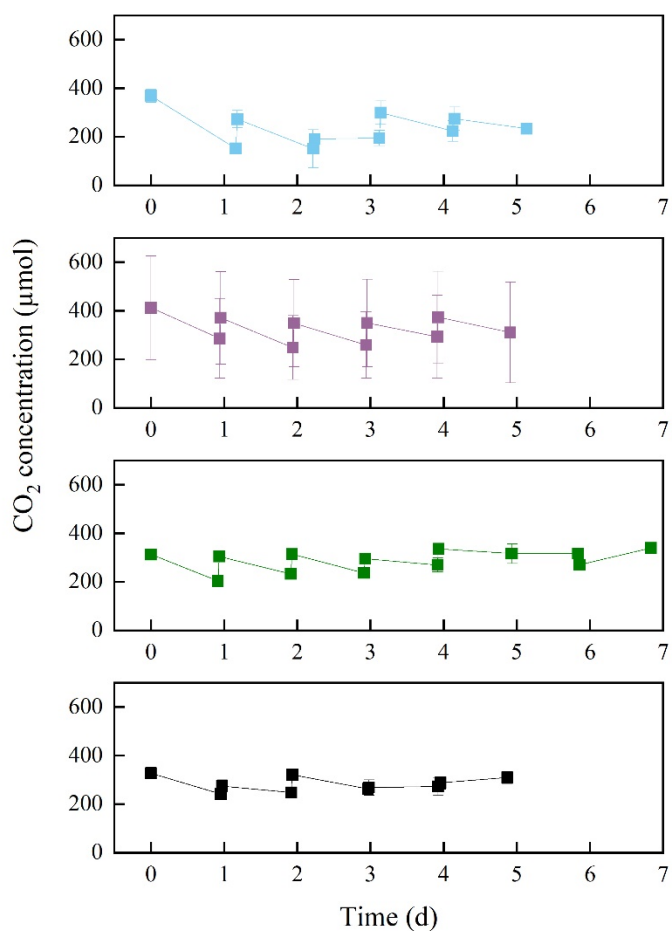

89

90 **Figure S2:** CO<sub>2</sub> concentration during batch experiments throughout time with the thermophilic archaeon *M.*  
 91 *thermautotrophicus* ΔH. Graphite-rod and activated-carbon anodes were included with three treatments for activated carbon,  
 92 including iron additions (soluble iron and magnetite). The error bars show the standard deviation for the average data from  
 93 triplicate systems.

94

95



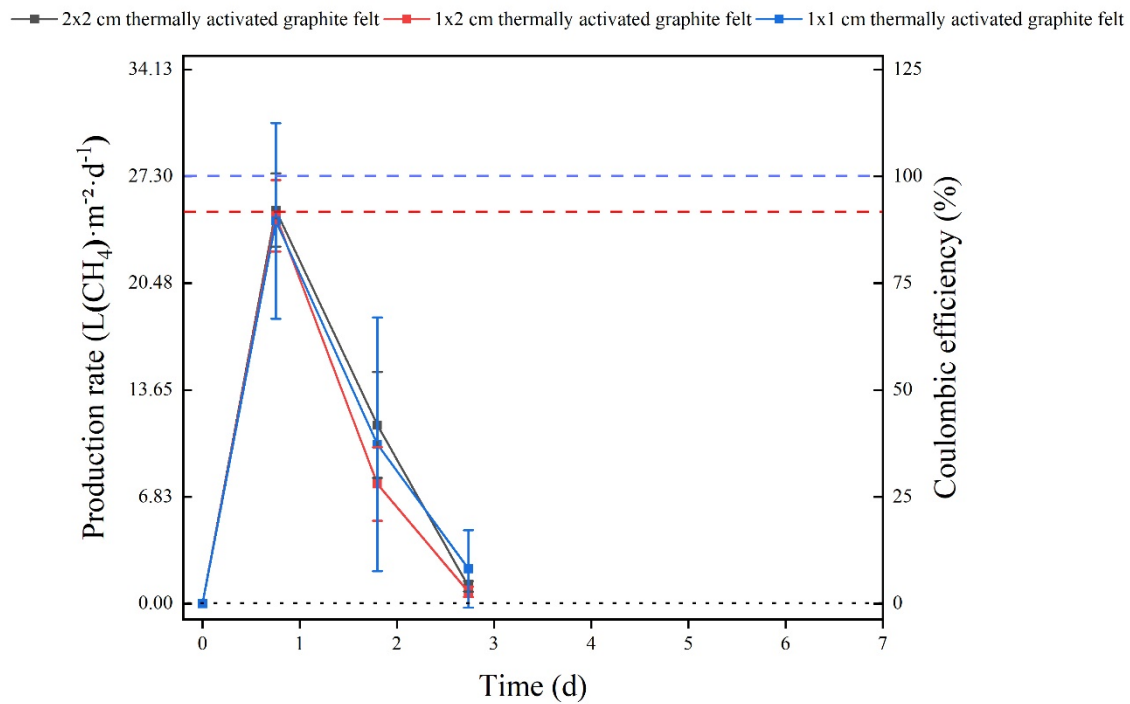

96

97

**Figure S3:** CH<sub>4</sub> production rates corrected to the cathode surface area and Coulombic efficiencies (at  $I = 1 \text{ A}\cdot\text{cm}^{-2}$ ) during batch experiments in our BES throughout time with L-cysteine and with the thermophilic archaeon *M. thermautotrophicus*  $\Delta\text{H}$ . Thermally activated graphite felt anodes were included with three different conditions (1x1 cm, 1x2 cm graphite felt, and 2x2 cm). The error bars show the standard deviation for the average data from triplicate systems. Carbon cloth was used as the cathode: (Y-axis 1) cathode-based geometric CH<sub>4</sub> production rates; and (Y-axis 2) Coulombic efficiencies.

98

99

100

101

102

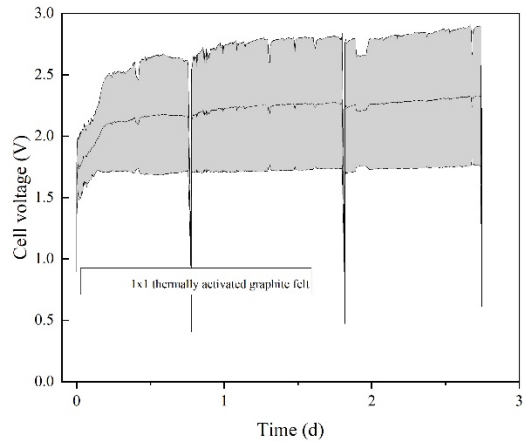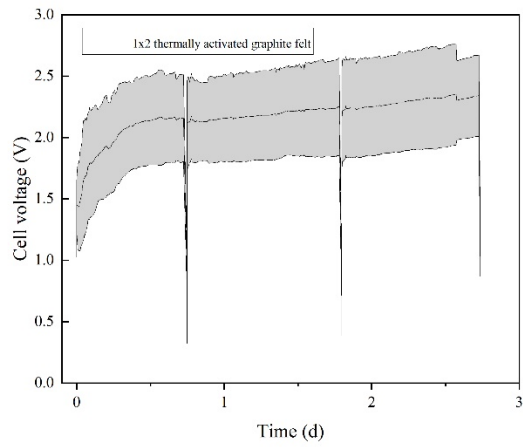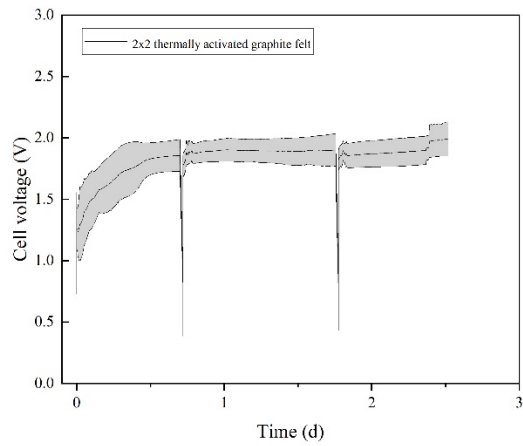

103

104  
105

**Figure S4:** Cell voltages of the BES experiment performed in triplicates using three different sizes (1x1, 1x2, and 2x2 cm) of the thermally activated graphite felt as anode.

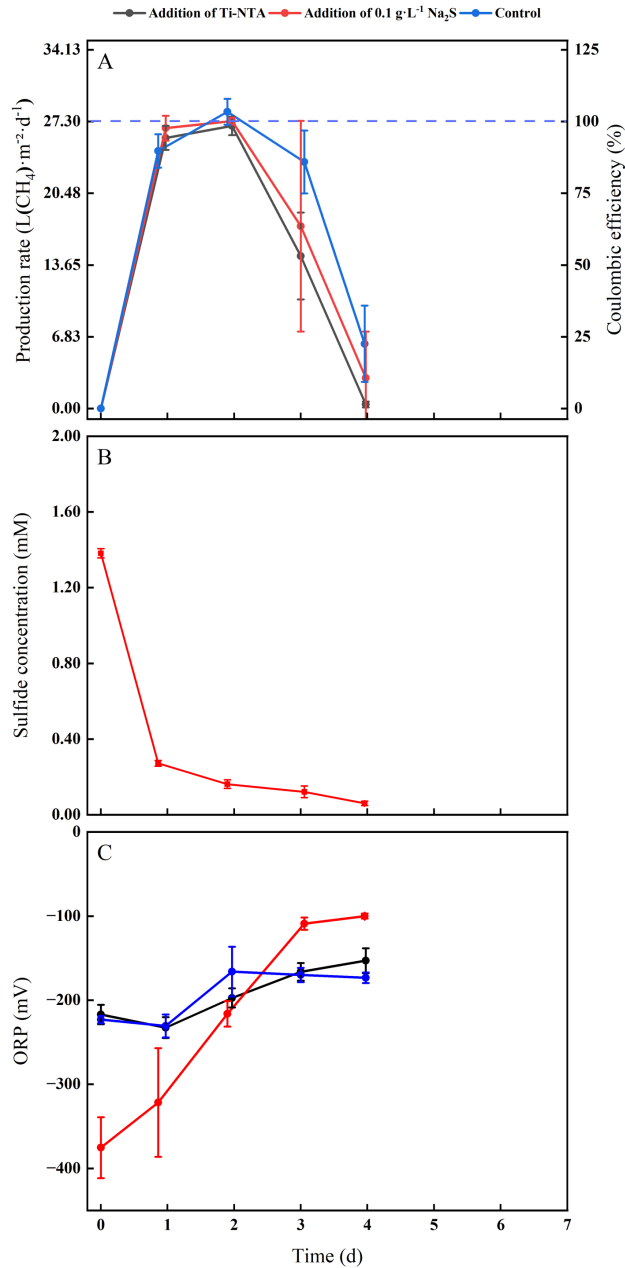

106

107 **Figure S5:** BES experiments with different reducing agents: **(A)** CH<sub>4</sub> production rates corrected to the cathode surface area and  
 108 Coulombic efficiencies (at  $I = 1 \text{ A}\cdot\text{cm}^{-2}$ ) during batch experiments throughout time with the thermophilic archaeon *M.*  
 109 *thermautotrophicus*  $\Delta$ H. Thermally activated graphite felt anodes were included with three different conditions (addition of Ti-  
 110 NTA with L-cysteine, addition of  $0.1 \text{ g}\cdot\text{L}^{-1} \text{ Na}_2\text{S}$  without L-cysteine, and control with L-cysteine). Ti-NTA was supplied at a ratio of  
 111 1:1000 at the beginning and every sampling point. Each condition included iron additions of  $0.1 \text{ g}\cdot\text{L}^{-1}$ . Carbon cloth was used as  
 112 the cathode: (Y-axis 1) cathode-based geometric CH<sub>4</sub> production rates; and (Y-axis 2) Coulombic efficiencies; **(B)** Sulfide  
 113 concentrations during the addition of  $0.1 \text{ g}\cdot\text{L}^{-1} \text{ Na}_2\text{S}$  batch experiment throughout time with the thermophilic archaeon *M.*  
 114 *thermautotrophicus*  $\Delta$ H; and **(C)** ORP measurement for all three conditions throughout time with the thermophilic archaeon *M.*  
 115 *thermautotrophicus*  $\Delta$ H. The error bars show the standard deviation for the average data from triplicate systems

116

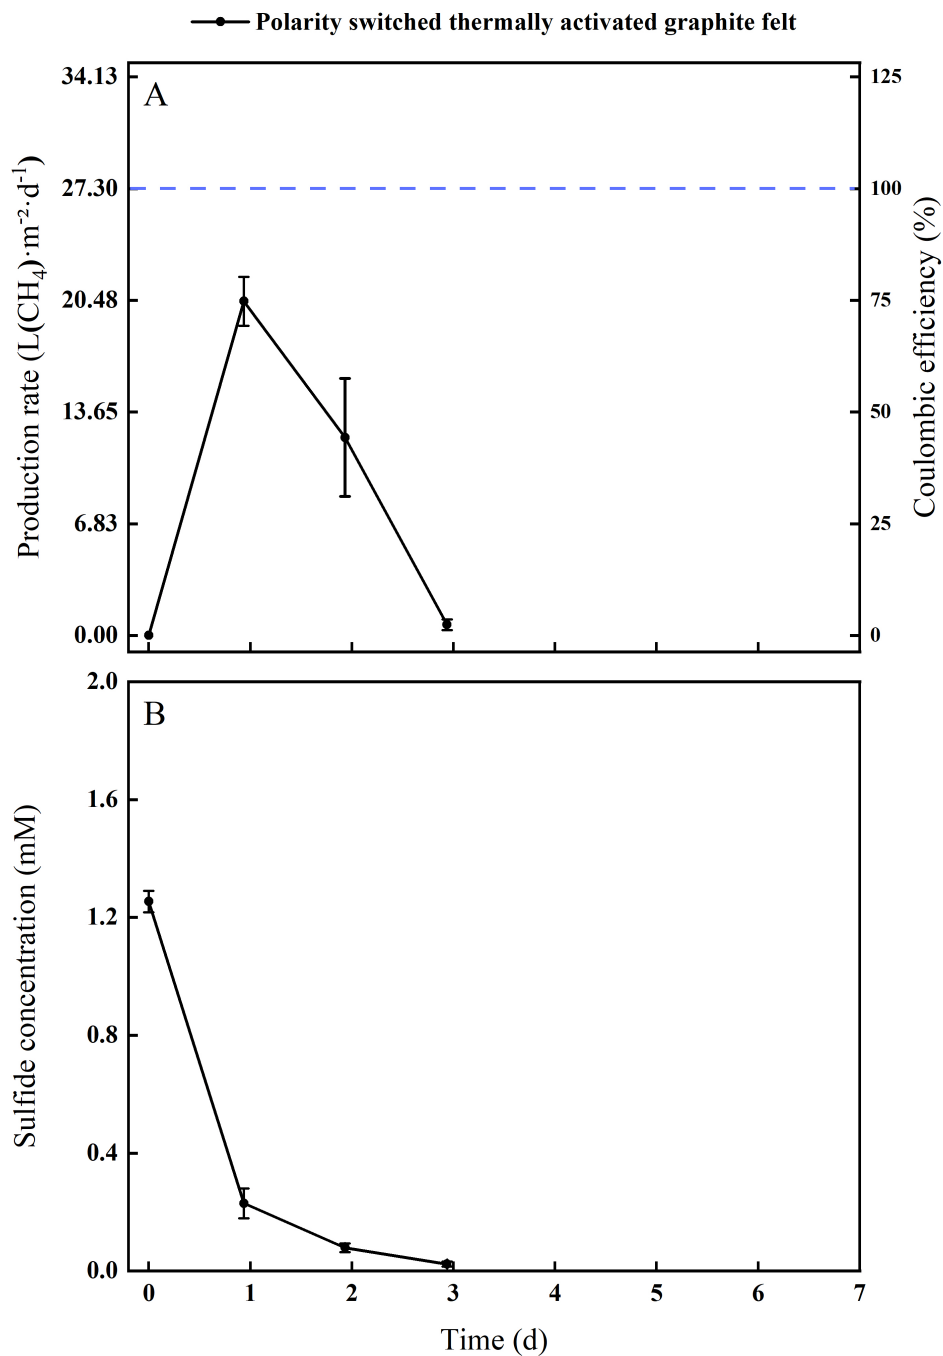

117

118 **Figure S6:** BES experiment with polarity switch: (A) CH<sub>4</sub> production rate corrected to the cathode surface area and Coulombic  
 119 efficiency (at  $I = 1 \text{ A}\cdot\text{cm}^{-2}$ ) during batch experiments throughout time with the thermophilic archaeon *M. thermautotrophicus*  $\Delta\text{H}$   
 120 when the polarity of the thermally activated graphite felt anodes was switched every 4h.  $0.1 \text{ g}\cdot\text{L}^{-1} \text{ Na}_2\text{S}$  was supplied to the  
 121 medium instead of L-cysteine; and (B) Sulfide concentrations during batch experiments throughout time. The error bars show the  
 122 standard deviation for the average data from triplicate systems.

123

124

125

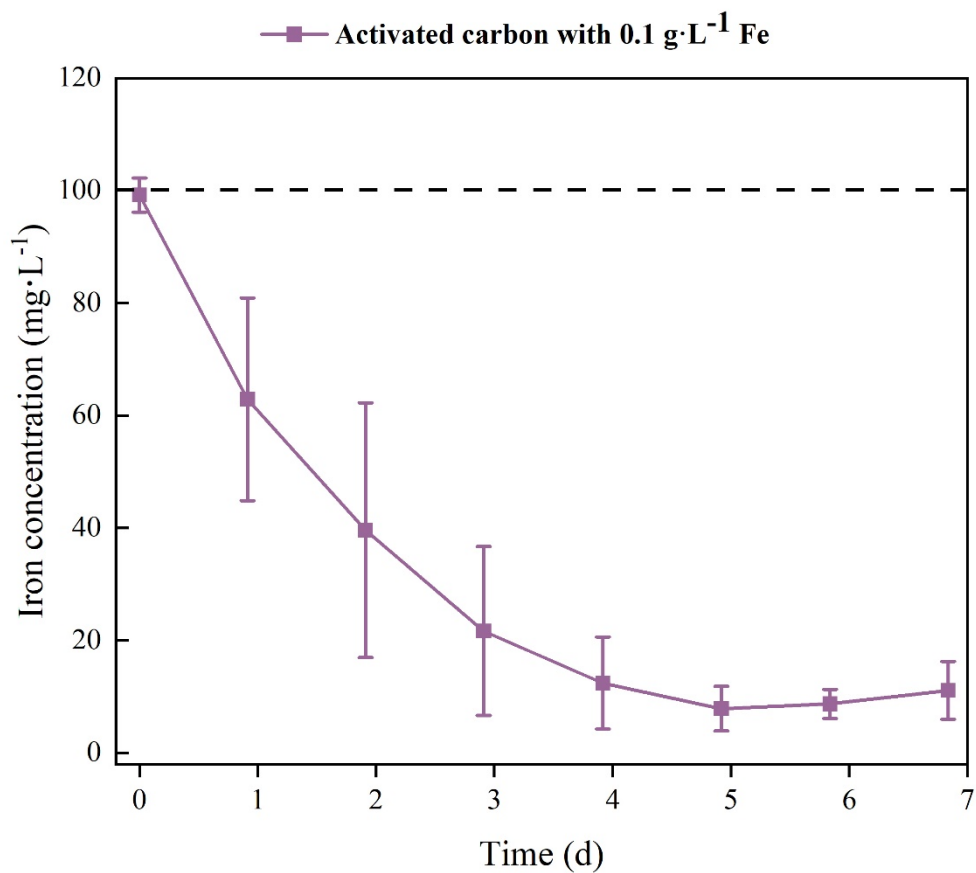

126

127 **Figure S7:** iron concentration during batch experiments of activated carbon-based anode with added iron throughout time with  
128 the thermophilic archaeon *M. thermautotrophicus* ΔH.

129

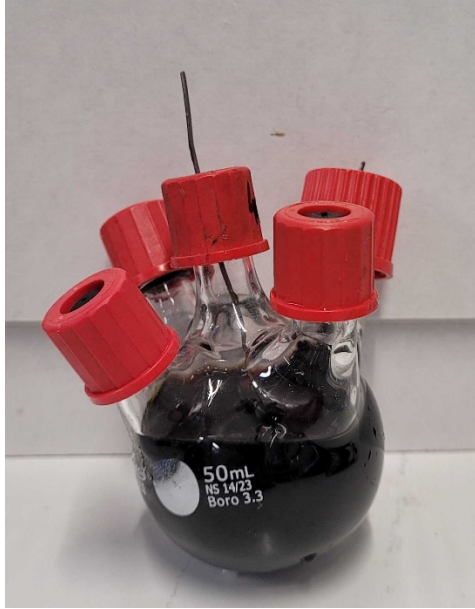

130

131 **Figure S8:** example of carbon corrosion after the BES experiment. The corroded carbon turned the medium black.

132

133

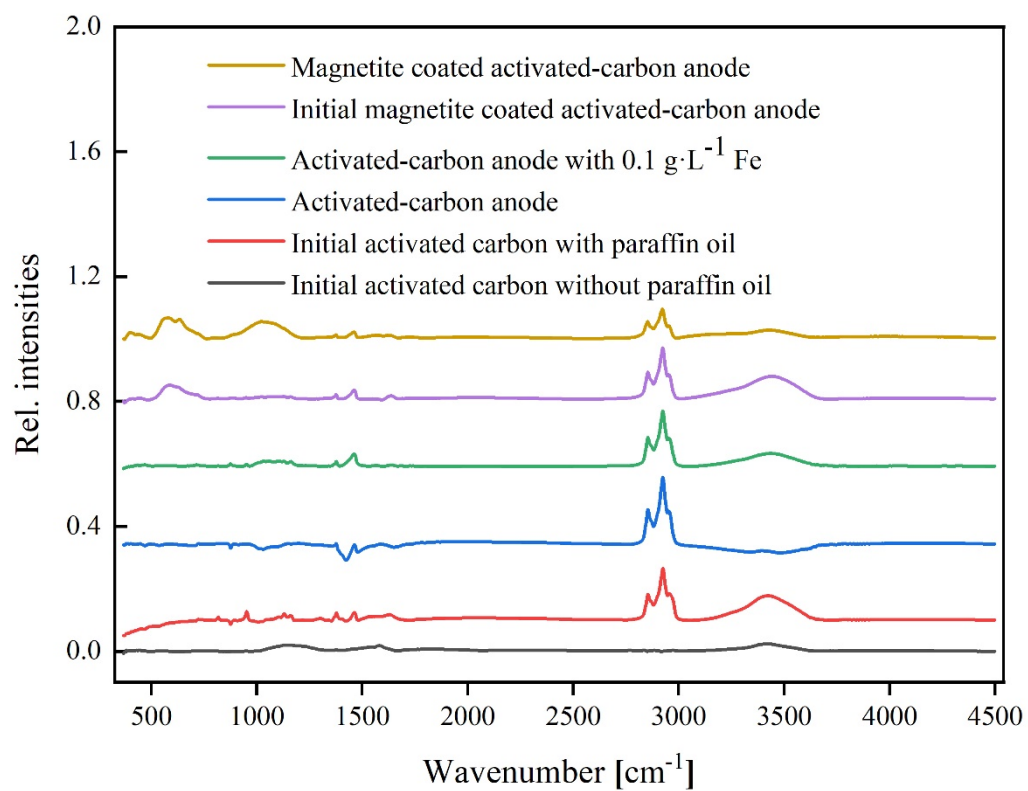

134

135 **Figure S9:** FTIR measurements of initial activated carbon with and without paraffin oil, activated-carbon anode, activated-carbon  
136 anode with 0.1 g·L<sup>-1</sup> Fe, initial magnetite-coated activated-carbon anode, and magnetite-coated activated-carbon anode. Samples  
137 were taken from dried anodes after 5 days of oxidation.

138

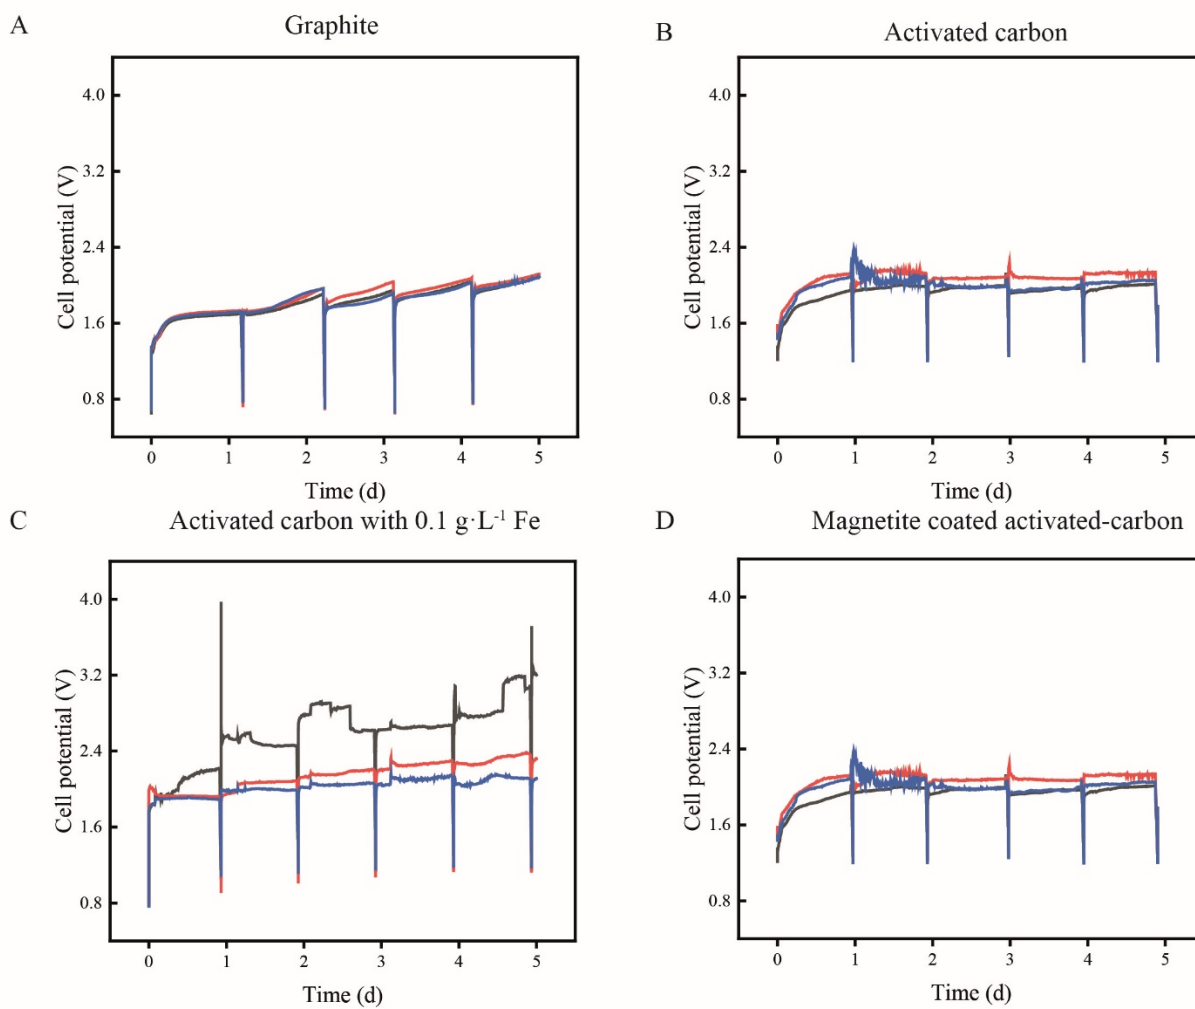

140

141 **Figure S10:** Cell potentials of the BES experiment performed in triplicates using different carbon based anodes: **(A)** graphite; **(B)**  
 142 activated-carbon; **(C)** activated-carbon with  $0.1 \text{ g}\cdot\text{L}^{-1} \text{ Fe}$ ; and **(D)** magnetite-coated activated-carbon.

143



144

145

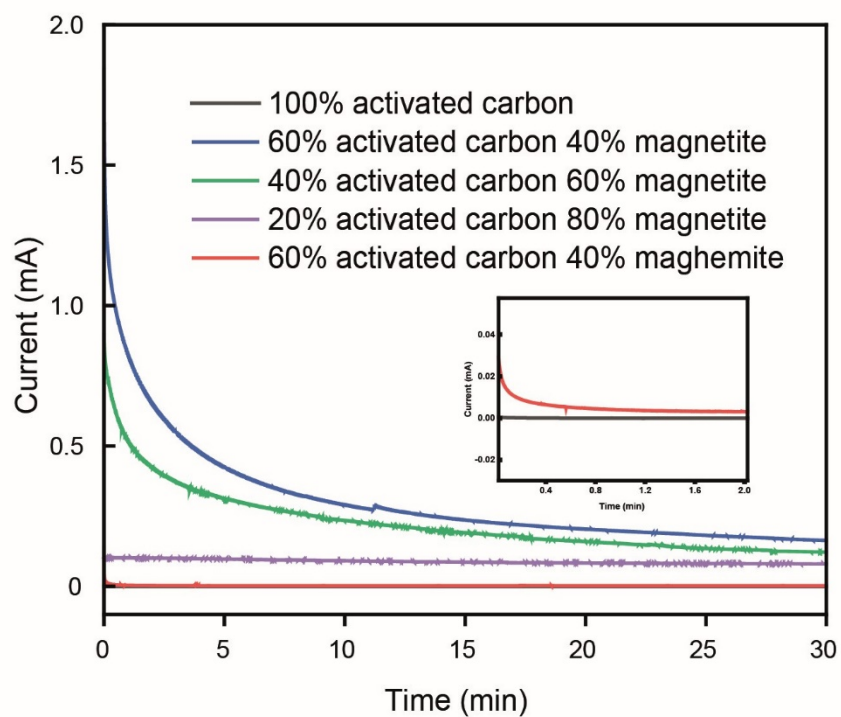

146

147 **Figure S11:** Chronoamperometric current traces of 100% activated carbon, 60% activated carbon & 40% magnetite, 40% activated  
148 carbon & 60% magnetite, 20% activated carbon & 80% magnetite, and 60% activated carbon & 40% maghemite at +0.6 V in 66  
149 mM phosphate buffer.

150

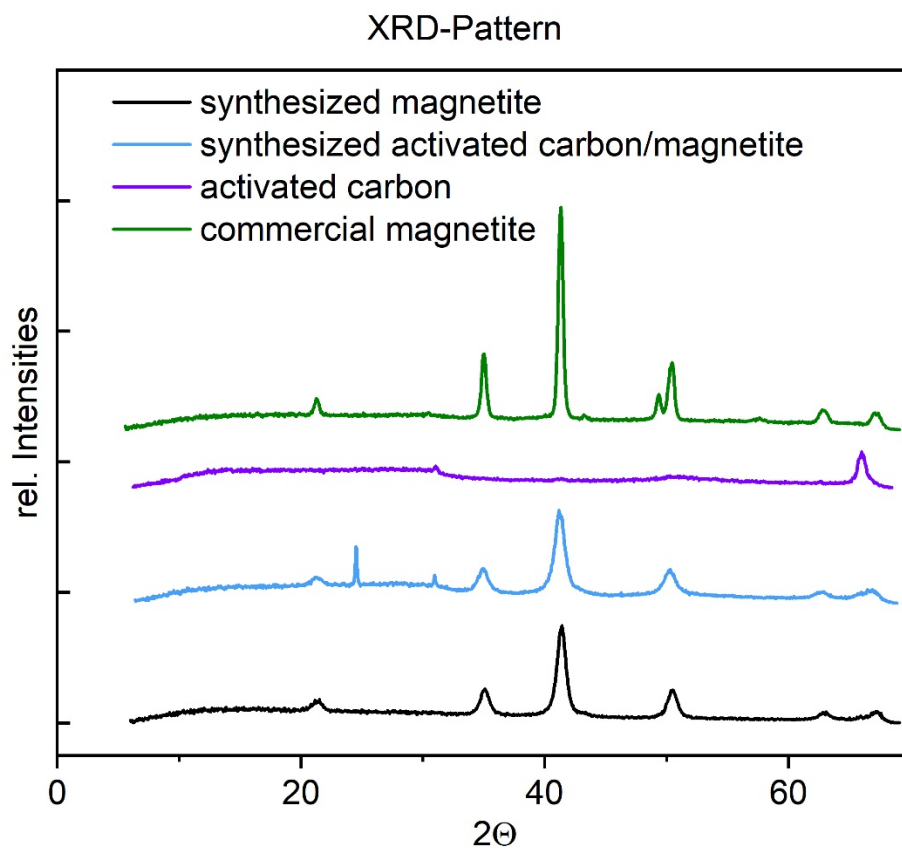

151

152 **Figure S12:** XRD pattern of synthesized magnetite, synthesized magnetite coated on activated carbon, activated carbon, and  
153 commercial magnetite.

154

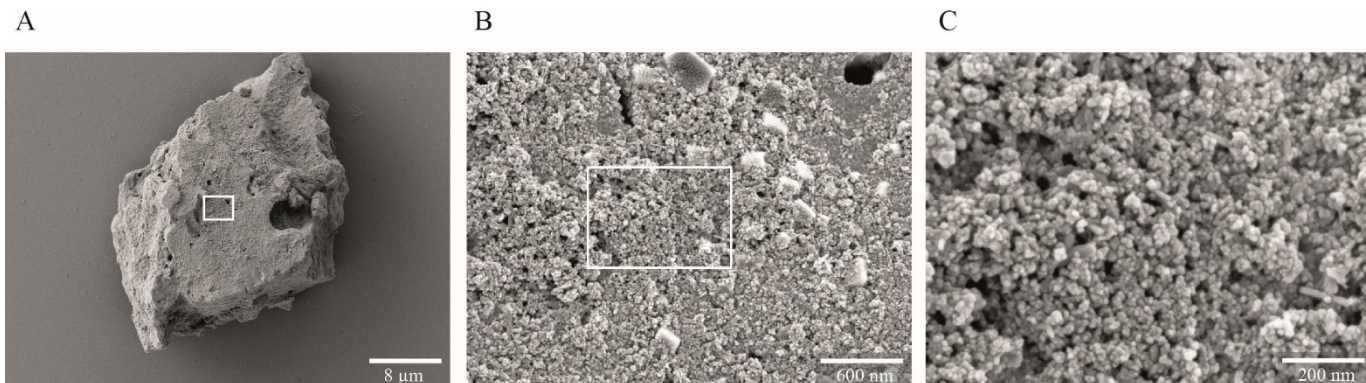

155

156 **Figure S13:** Scanning electron micrographs of magnetite-coated activated carbon: **(A)** Particle of magnetite-coated activated  
157 carbon with a 2300x magnification; **(B)** close-up from the rectangular-shaped area of (A) with a magnification of 35000x; and **(C)**  
158 close-up from the rectangular-shaped area of (B) with a magnification of 95000x.

159

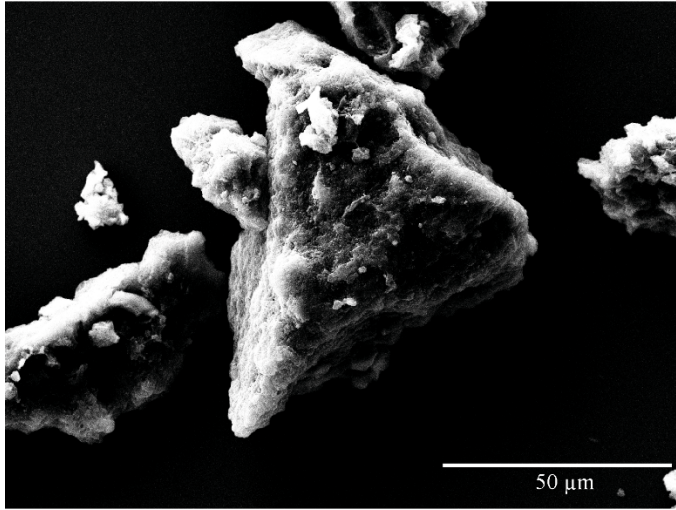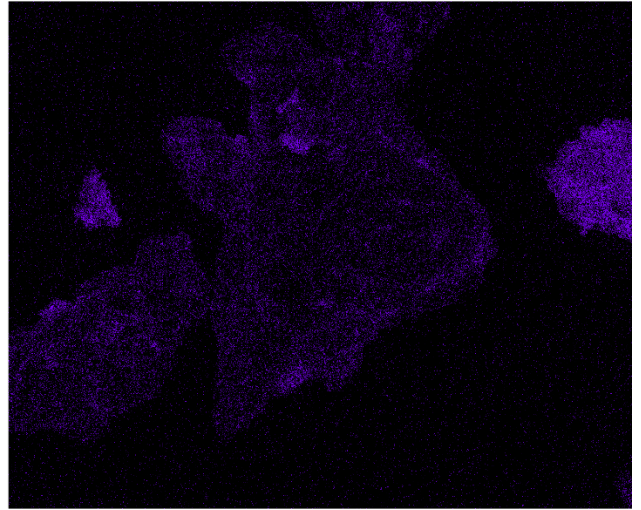

160

161 **Figure S14:** Scanning electron micrograph and its EDX Fe K $\alpha$  elemental mapping (in violet).

162

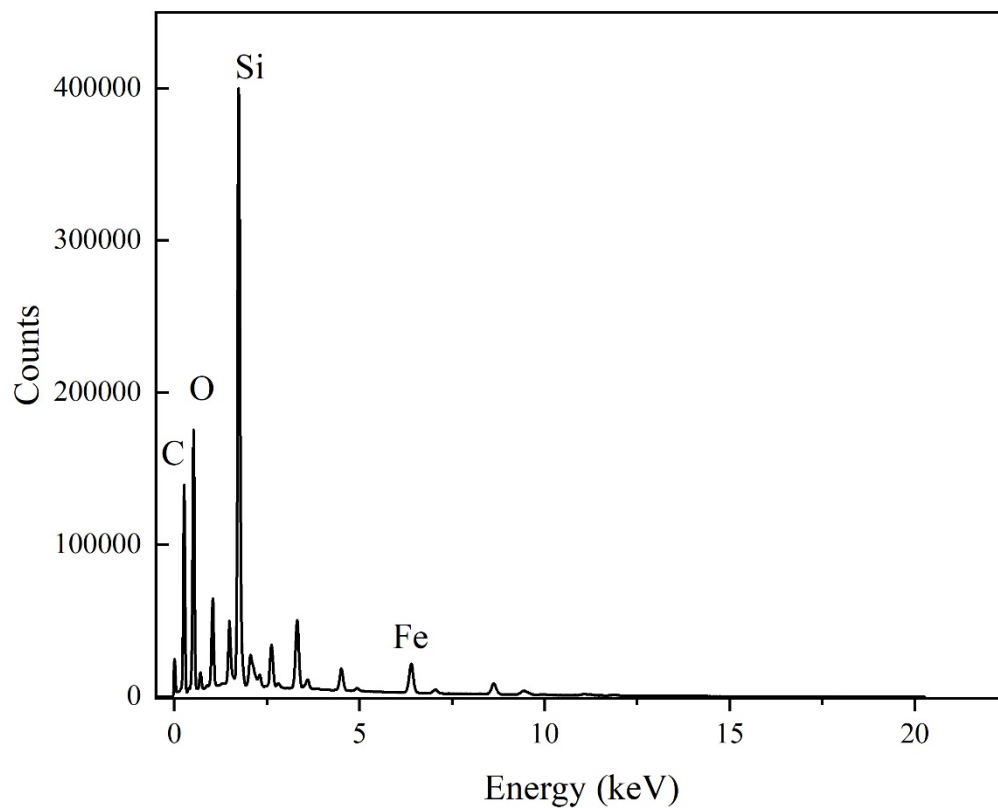

163

164 **Figure S15:** EDX Fe K $\alpha$  elemental mapping spectrum from Fig. S14.

165

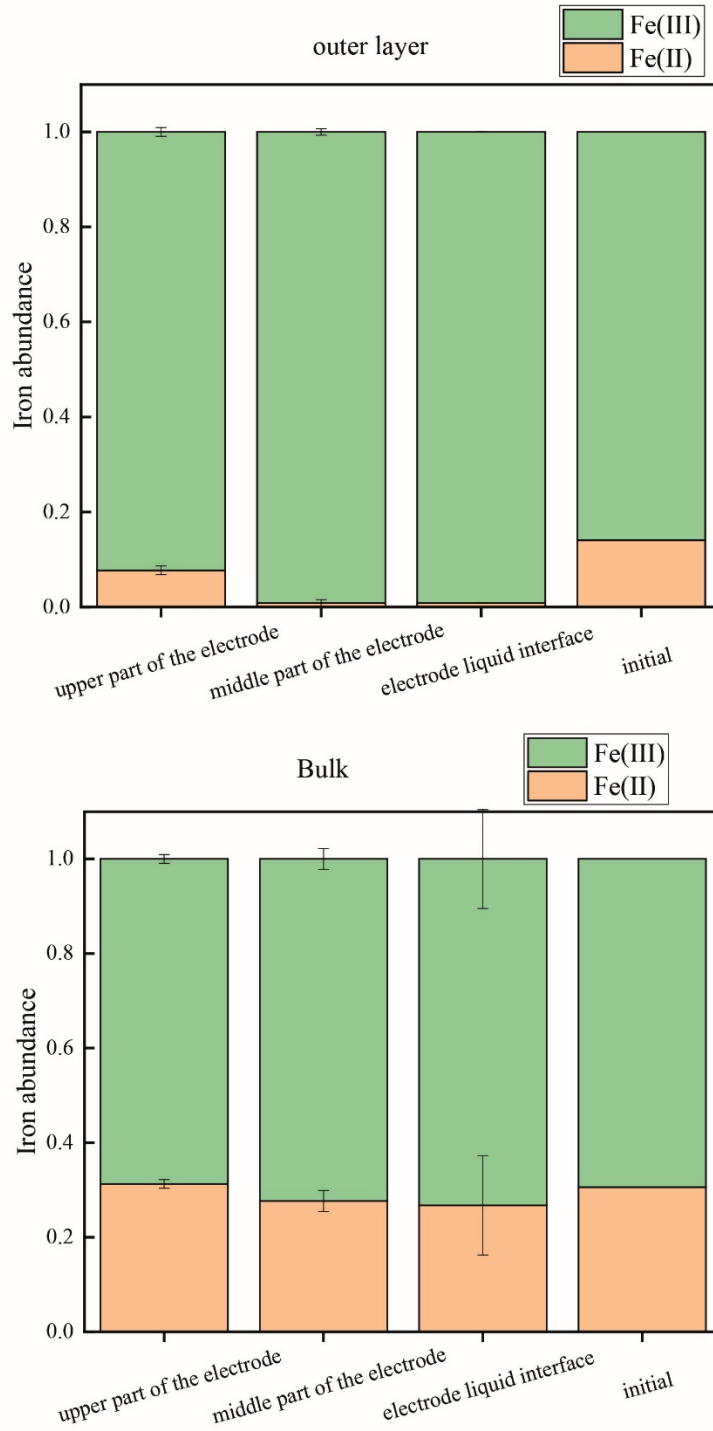

166

167  
168

**Figure S16:** Oxidation state of magnetite. Measured Fe(II) and Fe(III) abundance from the outer layer and bulk from the upper part, middle part, and the electrode liquid interface.

169 **References**

- 170 1. A. J. Bard and L. R. Faulkner, *Electrochemical Methods: Fundamentals and Applications*,  
171 *2nd Edition*, Wiley, Hoboken, NJ, USA, 2000.
- 172 2. R. M. Cornell and U. Schwertmann, *The Iron Oxides: Structure, Properties, Reactions,*  
173 *Occurrence and Uses*, Wiley, Weinheim, Germany, 2003.
- 174 3. H. Lee, B. Lee, M. Byun and H. Lim, *Energy Conversion and Management*, 2020, **224**,  
175 113477.
- 176 4. S. Ma, M. Sadakiyo, R. Luo, M. Heima, M. Yamauchi and P. J. A. Kenis, *Journal of Power*  
177 *Sources*, 2016, **301**, 219-228.
- 178 5. T. Zhang, W. Li, K. Huang, H. Guo, Z. Li, Y. Fang, R. M. Yadav, V. Shanov, P. M. Ajayan,  
179 L. Wang, C. Lian and J. Wu, *Nature Communications*, 2021, **12**, 5265.
- 180 6. L. Jourdin, T. Grieger, J. Monetti, V. Flexer, S. Freguia, Y. Lu, J. Chen, M. Romano, G.  
181 G. Wallace and J. Keller, *Environmental Science & Technology*, 2015, **49**, 13566-13574.
- 182 7. F. Kracke, J. S. Deutzmann, W. Gu and A. M. Spormann, *Green Chemistry*, 2020, **22**,  
183 6194-6203.

184
